# Supplementary material
Source: publisher figshare collection journal article supplement (https://acs.figshare.com/ndownloader/files/12544454)
Supplement: Supplementary file 1 [file 12544454]

## *Supporting information*

### **Extremely low resistance of $\text{Li}_3\text{PO}_4$ electrolyte/ $\text{Li}(\text{Ni}_{0.5}\text{Mn}_{1.5})\text{O}_4$ electrode interfaces**

*Hideyuki Kawasoko<sup>\*,†,§</sup>, Susumu Shiraki<sup>†</sup>, Toru Suzuki<sup>†</sup>, Ryota Shimizu<sup>‡</sup>, and Taro Hitosugi<sup>†,‡</sup>*

<sup>†</sup>Advanced Institute for Material Research, Tohoku University, 2-1-1 Katahira, Aoba, Sendai, Miyagi 980-8577, Japan

<sup>‡</sup>School of Materials and Chemical Technology, Tokyo Institute of Technology, 2-12-1 Ookayama, Meguro, Tokyo 152-8550, Japan

\*E-mail: [hideyuki.kawasoko.b7@tohoku.ac.jp](mailto:hideyuki.kawasoko.b7@tohoku.ac.jp)

## Equivalent circuit model

The impedance spectra were analyzed based on the equivalent circuit shown in Figure S1. In this model,  $R_{\text{Wire}}$ ,  $R_{\text{HF}}$ ,  $R_{\text{MF}}$ , and  $R_{\text{LF}}$  are the wiring resistance, the high-frequency resistance, the middle-frequency resistance, and the low-frequency resistance, respectively. The abbreviations,  $\text{CP}_{\text{HF}}$ ,  $\text{CP}_{\text{MF}}$ , and  $\text{CP}_{\text{LF}}$ , indicate constant phase elements of the high-frequency, middle-frequency, and the low-frequency regions, respectively. The fitting was performed in the frequency region between  $6 \times 10^0$  and  $1 \times 10^5$  Hz.

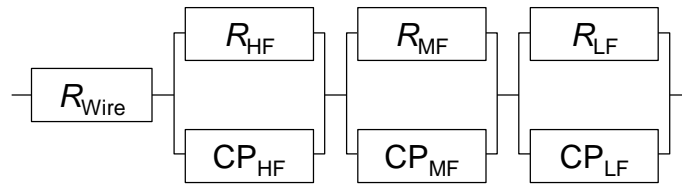

Figure S1. Equivalent circuit model for the analysis of impedance spectra.

Crystal structure analysis of  $\text{LiNi}_{0.5}\text{Mn}_{1.5}\text{O}_4/\text{LaNiO}_3$  epitaxial thin films, which displayed excellent charging and discharging characteristics.

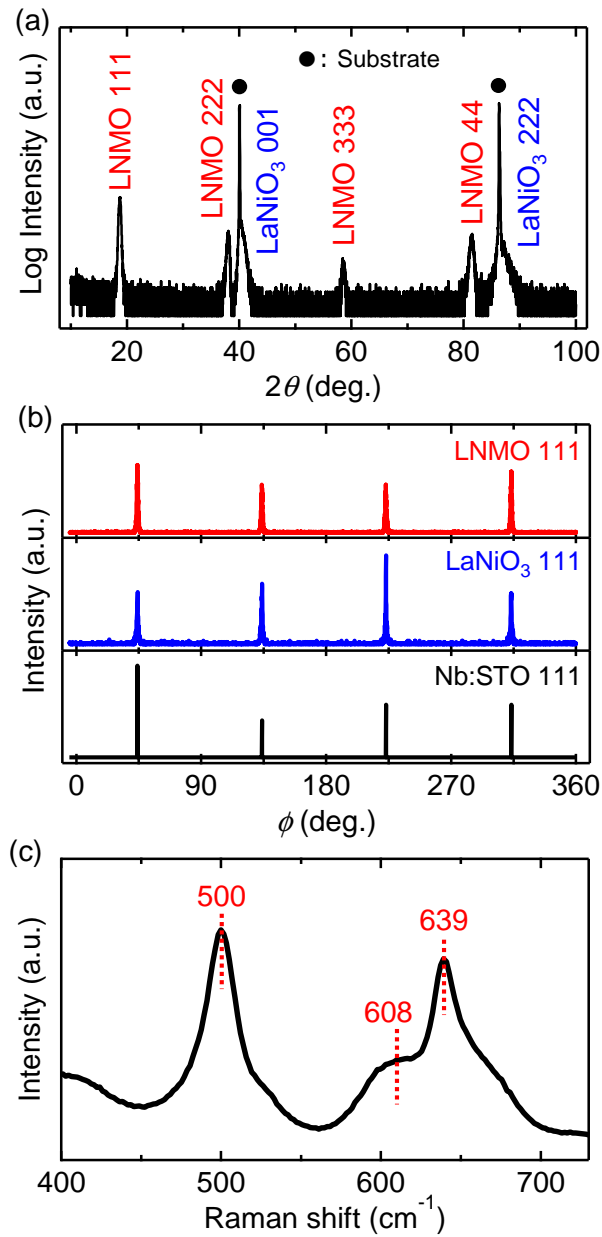

Figure S2. (a) In-plane X-ray diffraction pattern, (b)  $\phi$ -scan, and (c) Raman spectrum of an  $\text{LiNi}_{0.5}\text{Mn}_{1.5}\text{O}_4$  (LNMO)/ $\text{LaNiO}_3$  thin film.

## Estimation of activation energy

The  $E_a$  values were derived from the temperature dependence of the resistance components in the electrochemical impedance spectra with the use of the following Arrhenius equation:

$$\Sigma T = A \exp\left(-\frac{E_a}{kT}\right),$$

where  $\Sigma$ ,  $T$ ,  $A$ , and  $k$  are the resistance parameters ( $\sigma_{\text{LPO}}$ ,  $1/R_i$ , and  $1/R_{\text{LNMO}}$ ), the absolute temperature, the pre-exponential factor, and the Boltzmann constant, respectively. These values were estimated from electrochemical impedance spectra at 4.7 V (vs.  $\text{Li}^+/\text{Li}$ ) in the temperature range between 27 and 79 °C.

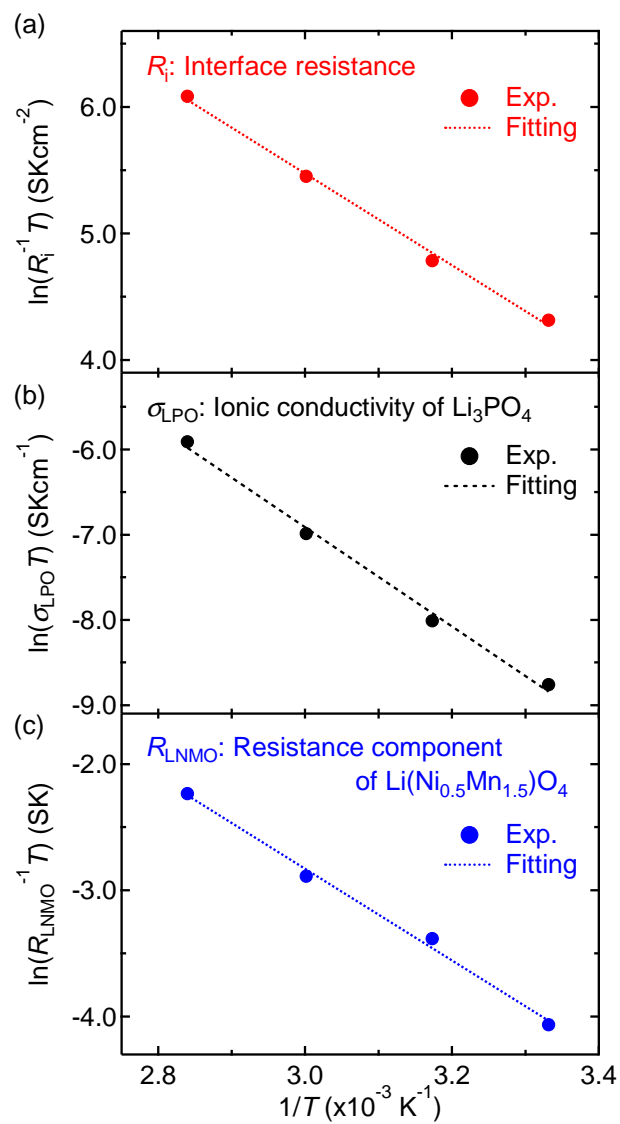

Figure S3. Temperature dependence of (a) interface resistance, (b) ionic conductivity of  $\text{Li}_3\text{PO}_4$ , and (c) resistance component of  $\text{LiNi}_{0.5}\text{Mn}_{1.5}\text{O}_4$  in fabricated lithium batteries.

## Battery performance of the fabricated thin-film Li batteries at 27 °C

Figure S4a and S4b show charge–discharge curves and rate capability, respectively, which were cycled at various current density from 0.0039 (1C) to 3.9 mA/cm<sup>2</sup> (1000C) between potentials of 3.2 and 4.8 V. Both the charge and discharge curves at 1 and 10C featured double plateaus at 4.7 V and a minor plateau at 4.0 V, which were attributed to Ni<sup>2+</sup>/Ni<sup>4+</sup> and Mn<sup>3+</sup>/Mn<sup>4+</sup> redox reactions, respectively. These charging and discharging characteristics were consistent with the results of CV measurements. At higher rates, the initial-state potential of the charge and discharge changed owing to the internal resistance of the thin-film LBs, and reduced the capacity of the LBs from 96 mA h/g at 0.039 mA/cm<sup>2</sup> (1C) to 1.8 mA h/g at 3.9 mA/cm<sup>2</sup> (1000C). At all rates, the Coulombic efficiency was approximately 100%, indicating that the fabricated LBs showed good reversibility. Furthermore, the LBs regained their capacity at 0.039 mA/cm<sup>2</sup> (1C) after charging and discharging at 3.9 mA/cm<sup>2</sup> (1000C), suggesting that the large current density—namely, fast Li-ion insertion/extraction—did not damage the solid-electrolyte/electrode interface or the crystal structure of LNMO.

Figure S4c shows the discharge capacity at various discharge rates, charging batteries in 0.039 mA/cm<sup>2</sup> (1C) with potentials controlled from 3.8 to 4.8 V at 27 °C. As the discharge rate increased, the double plateau region near 4.7 V shrank, indicating that the batteries were not fully discharged at these higher rates. In addition, the potential of the discharge initial state dropped owing to the internal resistance of the thin-film LBs. The discharge capacity decreased from 102 mA h/g at 0.039 mA/cm<sup>2</sup> (1C) to 68 mA h/g at 3.9 mA/cm<sup>2</sup> (1000C). Further increasing the discharge rate to 14 mA/cm<sup>2</sup> (3600C), decreased the discharge capacity to 0.10 mA h/g.

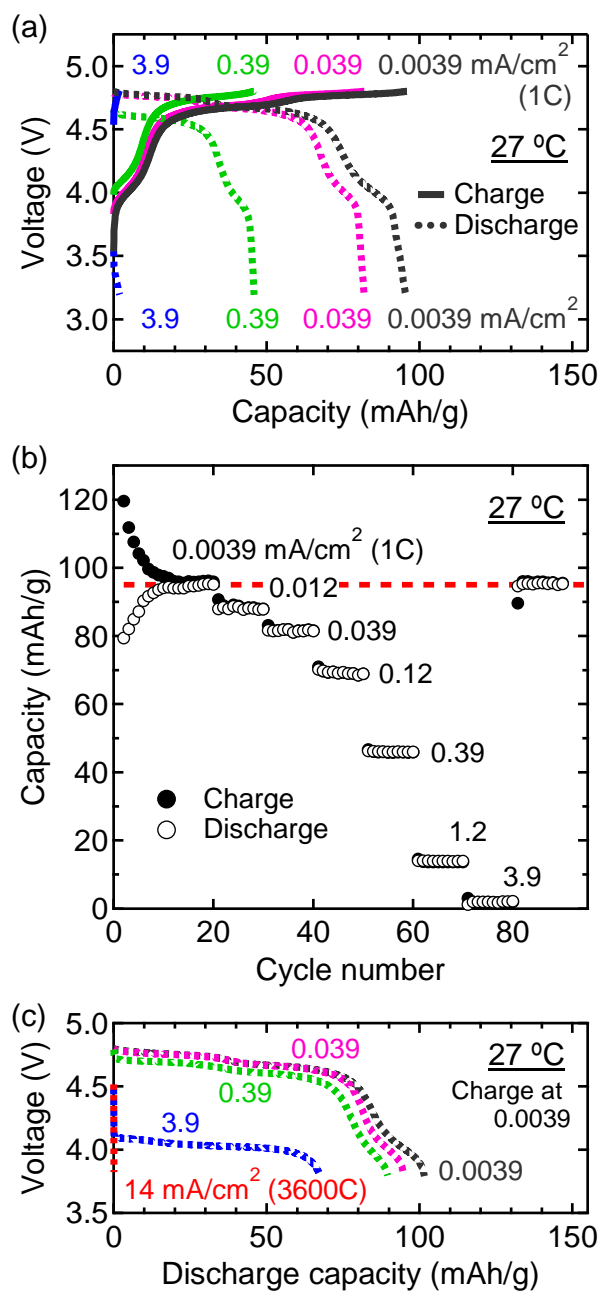

Figure S4. (a) Charge-discharge curves and (b) Rate capability at 27 °C. (c) Rate dependence of discharge curves at 27 °C.
